# Supplementary material for: Predicting extreme sub-hourly precipitation intensification based on temperature shifts
Source: Copernicus journal article supplement (doi:10.5194/hess-2023-226), 2023-09-20
Supplement: Supplementary file 1 [file hess-2023-226-supplement.pdf]

# **Predicting extreme sub-hourly precipitation intensification based on temperature shifts**

Francesco Marra<sup>1,2</sup>, Marika Koukoulou<sup>3</sup>, Antonio Canale<sup>4</sup>, and Nadav Peleg<sup>3</sup>

<sup>1</sup>Department of Geosciences, University of Padova, Padua, Italy

<sup>2</sup>Institute of Atmospheric Sciences and Climate, National Research Council, Bologna, Italy

<sup>3</sup>Institute of Earth Surface Dynamics, University of Lausanne, Lausanne, Switzerland

<sup>4</sup>Department of Statistical Sciences, University of Padova, Padua, Italy

## **Supporting Information**

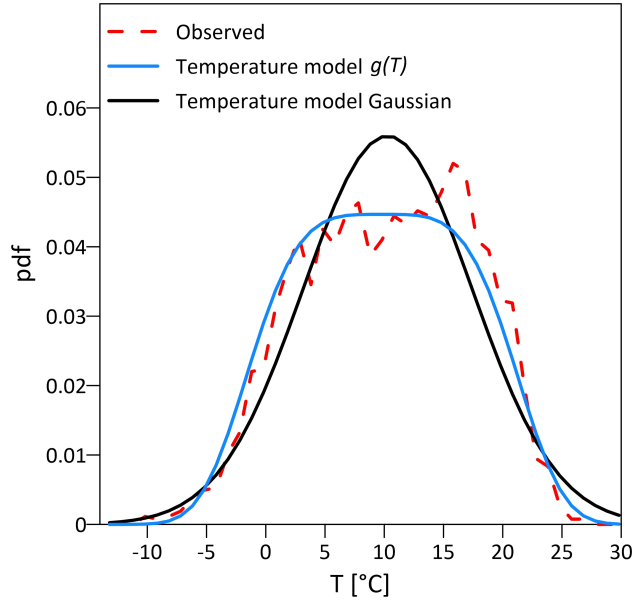

**Figure S1.** Empirical probability density of the average temperatures observed during the 24 hours preceding the 10-minute peak precipitation intensities (dashed red) and the estimated Generalized Gaussian temperature model  $g(T)$  (solid blue) – as in Fig. 2b. A black line represents the estimated Normal (Gaussian) temperature model.

**Table S1.** Location of the climate stations used in the case study. Coordinates are in Swiss projections (LV95).

| Name          | Lon [m] | Lat [m] | Elevation [m] |
|---------------|---------|---------|---------------|
| Aadorf        | 2710518 | 1259824 | 539           |
| Adelboden     | 2609372 | 1148939 | 1321          |
| Aigle         | 2560404 | 1130713 | 381           |
| Altdorf       | 2690181 | 1193564 | 438           |
| Chasseral     | 2570845 | 1220158 | 1594          |
| Lugano        | 2717874 | 1095883 | 273           |
| Piz Corvatsch | 2783156 | 1143524 | 3294          |
| Säntis        | 2744188 | 1234920 | 2501          |

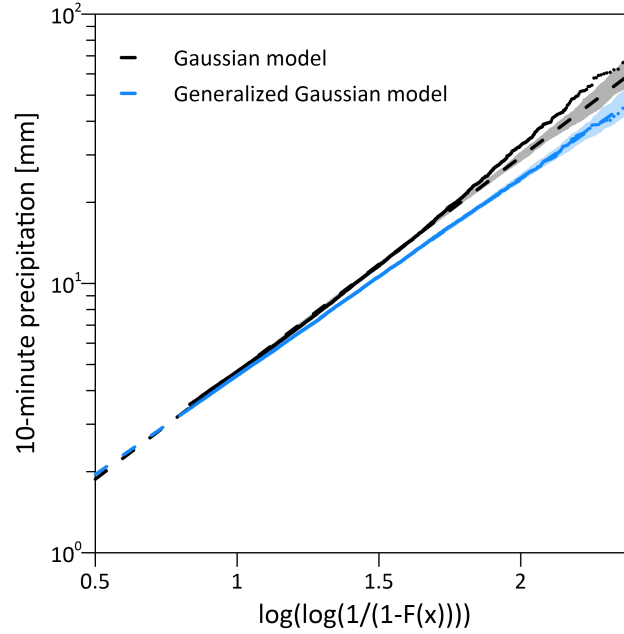

**Figure S2.** Example of empirical parent distributions of the event magnitude  $F(x)$  emerging from the combination of the Weibull model  $W(x; T)$  in Fig. 2a with two temperature models, namely the Generalized Gaussian temperature model  $g(T)$  (blue line here and in Fig. S1) and the Gaussian temperature model (black line here and in Fig. S1), which has a heavier right tail. The shaded areas show the 5-95th sampling confidence intervals from Weibull tails fitted to the models; the black dots are not likely samples from a Weibull tail. The samples shown here consist of  $2 \cdot 10^5$  points.

**Table S2.** Projections of changes in mean temperature  $\mu$  [ $^{\circ}\text{C}$ ], the standard deviation of temperature  $\sigma$ , and the occurrence of annual precipitation events  $n$  from 10 climate models obtained from the official CH2018 climate change projections of Switzerland. The projections are for the end of the century (2080-2099) in comparison with the reference period of 1981-2020, for the RCP8.5 emission scenario.

| Climate model        | Aadorf |          |      | Adelboden |          |      | Aigle  |          |      | Altdorf |          |      | Chasseral |          |      | Lugano |          |      | Piz    |          |      | Säntis |          |      |
|----------------------|--------|----------|------|-----------|----------|------|--------|----------|------|---------|----------|------|-----------|----------|------|--------|----------|------|--------|----------|------|--------|----------|------|
|                      | $\mu+$ | $\sigma$ | $n$  | $\mu+$    | $\sigma$ | $n$  | $\mu+$ | $\sigma$ | $n$  | $\mu+$  | $\sigma$ | $n$  | $\mu+$    | $\sigma$ | $n$  | $\mu+$ | $\sigma$ | $n$  | $\mu+$ | $\sigma$ | $n$  | $\mu+$ | $\sigma$ | $n$  |
| SMHI-RCA_MPIESM      | 2.8    | 0.99     | 0.96 | 4.4       | 1.29     | 1.03 | 2.9    | 1.07     | 0.97 | 4.1     | 1.20     | 1.03 | 3.1       | 1.04     | 0.95 | 2.6    | 1.06     | 1.00 | 4.2    | 1.37     | 1.03 | 3.5    | 0.99     | 0.96 |
| SMHI-RCA_IPSL        | 3.2    | 1.01     | 0.93 | 5.5       | 1.39     | 0.96 | 3.2    | 1.15     | 0.89 | 5.3     | 1.32     | 0.99 | 3.5       | 1.06     | 0.89 | 2.9    | 1.06     | 0.94 | 5.5    | 1.47     | 0.96 | 3.8    | 1.03     | 0.92 |
| SMHI-RCA_HADGEM      | 3.7    | 1.01     | 0.94 | 6.4       | 1.41     | 0.98 | 4.1    | 1.13     | 0.92 | 5.5     | 1.32     | 1.03 | 4.2       | 1.08     | 0.90 | 3.8    | 1.05     | 0.93 | 6.5    | 1.56     | 1.01 | 4.1    | 1.08     | 0.94 |
| SMHI-RCA_ECEARTH     | 3.6    | 1.01     | 0.93 | 5.0       | 1.31     | 0.98 | 3.7    | 1.15     | 0.90 | 4.8     | 1.28     | 0.99 | 4.1       | 1.07     | 0.91 | 3.4    | 1.06     | 0.92 | 4.7    | 1.34     | 0.98 | 4.1    | 1.06     | 0.96 |
| MPICSC-REMO2_MPIESM  | 2.0    | 0.97     | 1.01 | 3.0       | 1.07     | 0.96 | 1.6    | 1.03     | 1.03 | 2.5     | 1.07     | 0.98 | 2.6       | 1.05     | 1.00 | 2.2    | 1.04     | 0.96 | 3.2    | 1.12     | 0.95 | 2.5    | 1.02     | 1.02 |
| MPICSC-REMO1_MPIESM  | 2.1    | 0.91     | 1.00 | 2.7       | 1.03     | 0.97 | 1.7    | 0.99     | 1.03 | 2.4     | 1.02     | 0.99 | 2.5       | 0.97     | 0.98 | 2.3    | 1.00     | 0.98 | 3.0    | 1.09     | 0.95 | 2.3    | 0.96     | 1.00 |
| DMI-HIRHAM_ECEARTH   | 2.7    | 1.04     | 0.97 | 2.8       | 1.07     | 0.96 | 2.3    | 1.07     | 0.96 | 2.8     | 1.13     | 0.99 | 2.8       | 1.08     | 0.96 | 3.0    | 1.10     | 1.01 | 2.8    | 1.07     | 0.95 | 3.0    | 1.06     | 0.97 |
| CLMCOM-CCLM4_MPIESM  | 2.2    | 0.94     | 0.93 | 2.5       | 1.01     | 0.93 | 1.8    | 0.99     | 0.92 | 2.1     | 1.02     | 0.93 | 2.3       | 0.98     | 0.90 | 1.5    | 1.02     | 0.89 | 2.6    | 1.00     | 0.92 | 2.6    | 0.98     | 0.92 |
| CLMCOM-CCLM4_HADGEM  | 3.0    | 1.00     | 0.84 | 3.1       | 1.01     | 0.82 | 2.4    | 0.99     | 0.78 | 2.5     | 1.04     | 0.81 | 3.8       | 1.11     | 0.83 | 2.4    | 1.03     | 0.74 | 3.7    | 1.04     | 0.85 | 3.5    | 1.09     | 0.82 |
| CLMCOM-CCLM4_ECEARTH | 2.7    | 0.96     | 0.91 | 3.2       | 1.02     | 0.89 | 2.3    | 1.00     | 0.86 | 2.6     | 1.03     | 0.90 | 2.9       | 1.02     | 0.86 | 2.1    | 1.04     | 0.81 | 3.3    | 1.03     | 0.90 | 3.1    | 1.01     | 0.91 |

**Table S3.** Model parameters for the eight stations.

| Name      | $\lambda_0$ | $\alpha$ | $\kappa_0$ | <b>b</b> |
|-----------|-------------|----------|------------|----------|
| Aadorf    | 0.313       | 0.111    | 0.865      | 0        |
| Adelboden | 0.073       | 0.222    | 0.516      | 0.026    |
| Aigle     | 0.207       | 0.122    | 1.043      | 0        |
| Altdorf   | 0.106       | 0.144    | 0.931      | 0        |
| Chasseral | 0.455       | 0.127    | 0.742      | 0.019    |
| Lugano    | 0.855       | 0.084    | 1.113      | 0        |
| Piz       | 0.942       | 0.109    | 1.143      | 0.032    |
| Säntis    | 1.143       | 0.135    | 0.915      | 0.034    |

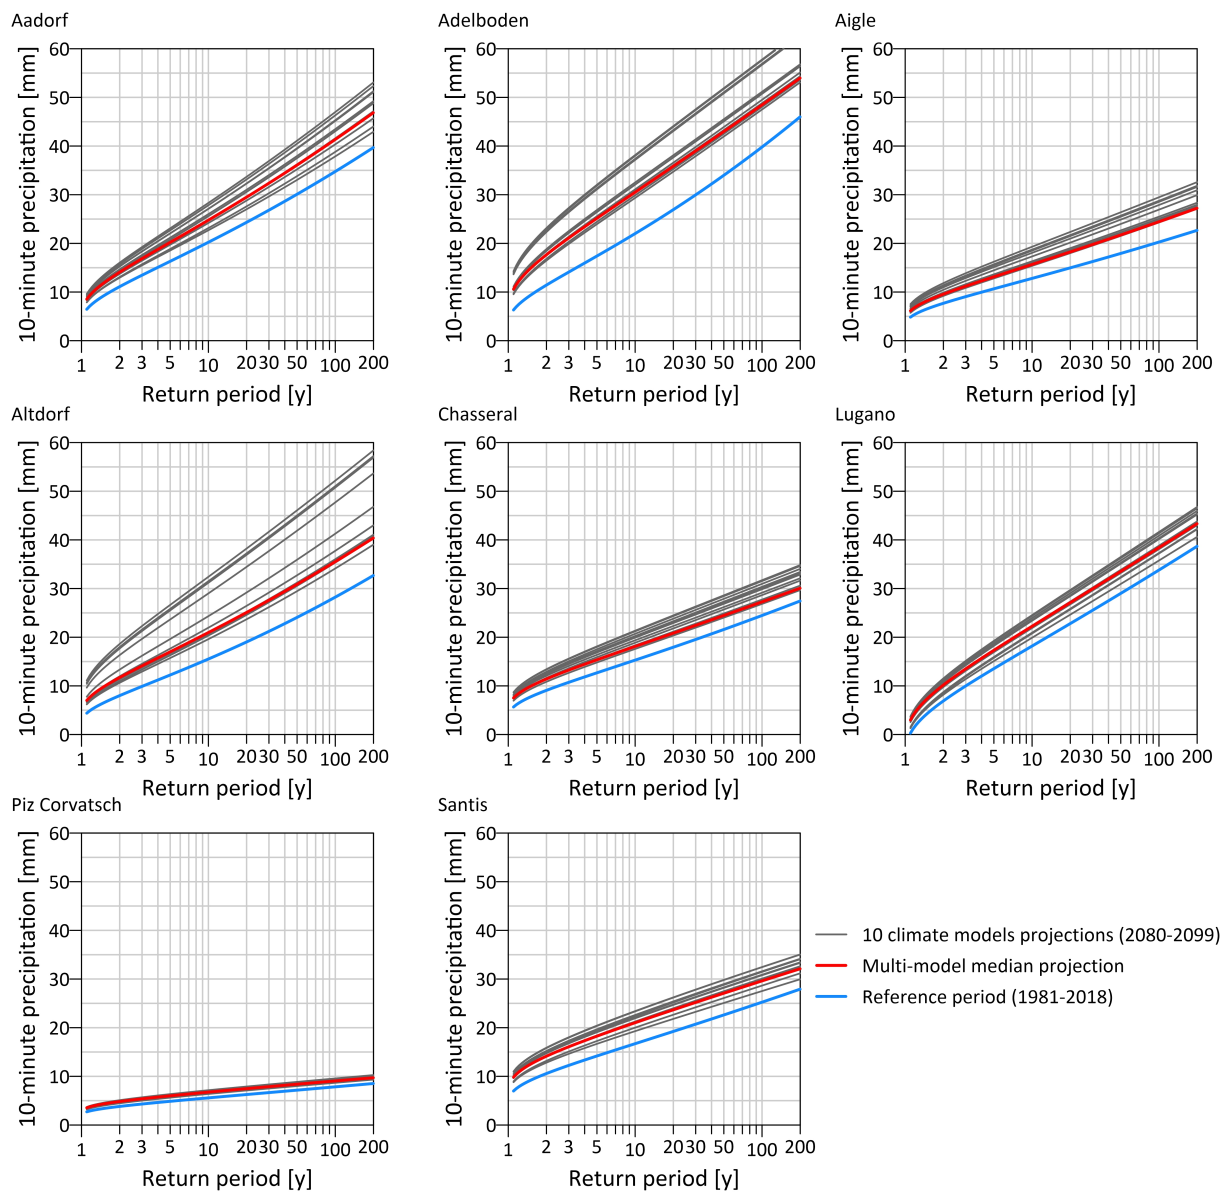

**Figure S3.** As Fig. 9 but for all 8 climate stations.
